# Supplementary material for: Importance of the chromophore orientation to the ligand-to-metal energy transfer in lanthanide complexes with pendant-arm fitted cyclen derivatives
Source: Royal Society of Chemistry journal article supplement (doi:10.1039/b101312m), 2001-01-01
Supplement: b101312m.doc [file b101312m.doc]

# Importance of the chromophore orientation on the ligand-to-metal energy transfer in lanthanide complexes with pendant-arm fitted cyclen derivatives

# Gaël Zucchi, Rosario Scopelliti, and Jean-Claude G. Bünzli

*Institute of Inorganic and Analytical Chemistry, University of Lausanne, CH-1015 Lausanne, Switzerland. (Jean-Claude.Bunzli@icma.unil.ch)*

**SUPPORTING INFORMATION**

**(7 PAGES)**

**Table S1.** Selected bond lengths (Å) and angles (°) in the complexes.

|  | Eu(1)-O(1) 2.344(6) | Eu(1)-N(1) 2.680(6) |
| --- | --- | --- |
|  | Eu(1)-O(2) 2.392(5) | Eu(1)-N(2) 2.685(6) |
| EuL2 | Eu(1)-O(3) 2.377(4) | Eu(1)-N(3) 2.647(6) |
|  | Eu(1)-O(4) 2.401(4) | Eu(1)-N(4) 2.709(7) |
|  | Eu(1)-O(5) 2.431(5) |  |
|  | O(1)-Eu(1)-O(3) 145.74(17) | N(1)-Eu(1)-N(3) 102.73(18) |
|  | O(2)-Eu(1)-O(4) 144.96(18) | N(2)-Eu(1)-N(4) 102.8(2) |
|  |  |  |
|  | Eu(1)-O(1) 2.441(9) | Eu(1)-N(1) 2.620(13) |
|  | Eu(1)-O(4) 2.390(10) | Eu(1)-N(2) 2.625(11) |
| EuL3 | Eu(1)-O(7) 2.417(8) | Eu(1)-N(3) 2.662(11) |
|  | Eu(1)-O(10) 2.407(10) | Eu(1)-N(4) 2.636(12) |
|  | Eu(1)-O(13) 2.451(9) |  |
|  | O(1)-Eu(1)-O(7) 141.1(3) | N(1)-Eu(1)-N(3) 103.2(3) |
|  | O(4)-Eu(1)-O(10) 138.2(3) | N(2)-Eu(1)-N(4) 104.6(3) |
|  |  |  |
|  | Lu(1A)-O(1A) 2.364(9) | Lu(1A)-N(1A) 2.580(10) |
|  | Lu(1A)-O(4A) 2.287(10) | Lu(1A)-N(2A) 2.564(12) |
|  | Lu(1A)-O(7A) 2.307(8) | Lu(1A)-N(3A) 2.546(10) |
| LuL3 (A) | Lu(1A)-O(10A) 2.313(10) | Lu(1A)-N(4A) 2.578(13) |
|  | Lu(1A)-O(13A) 2.347(9) |  |
|  | O(4A)-Lu(1A)-O(10A) 141.5(4) | N(3A)-Lu(1A)-N(1A) 106.9(4) |
|  | O(4A)-Lu(1A)-O(13A) 71.4(3) | N(2A)-Lu(1A)-N(4A) 108.8(4) |
|  |  |  |
|  | Lu(1B)-O(1B) 2.320(9) | Lu(1B)-N(1B) 2.573(10) |
|  | Lu(1B)-O(4B) 2.275(11) | Lu(1B)-N(2B) 2.553(12) |
|  | Lu(1B)-O(7B) 2.341(9) | Lu(1B)-N(3B) 2.553(12) |
| LuL3 (B) | Lu(1B)-O(10B) 2.303(10) | Lu(1B)-N(4B) 2.564(13) |
|  | Lu(1B)-O(13B) 2.365(10) |  |
|  | O(4B)-Lu(1B)-O(10B) 139.9(4) | N(3B)-Lu(1B)-N(1B) 108.2(4) |
|  | O(4B)-Lu(1B)-O(13B) 69.3(4) | N(2B)-Lu(1B)-N(4B) 108.2(4) |


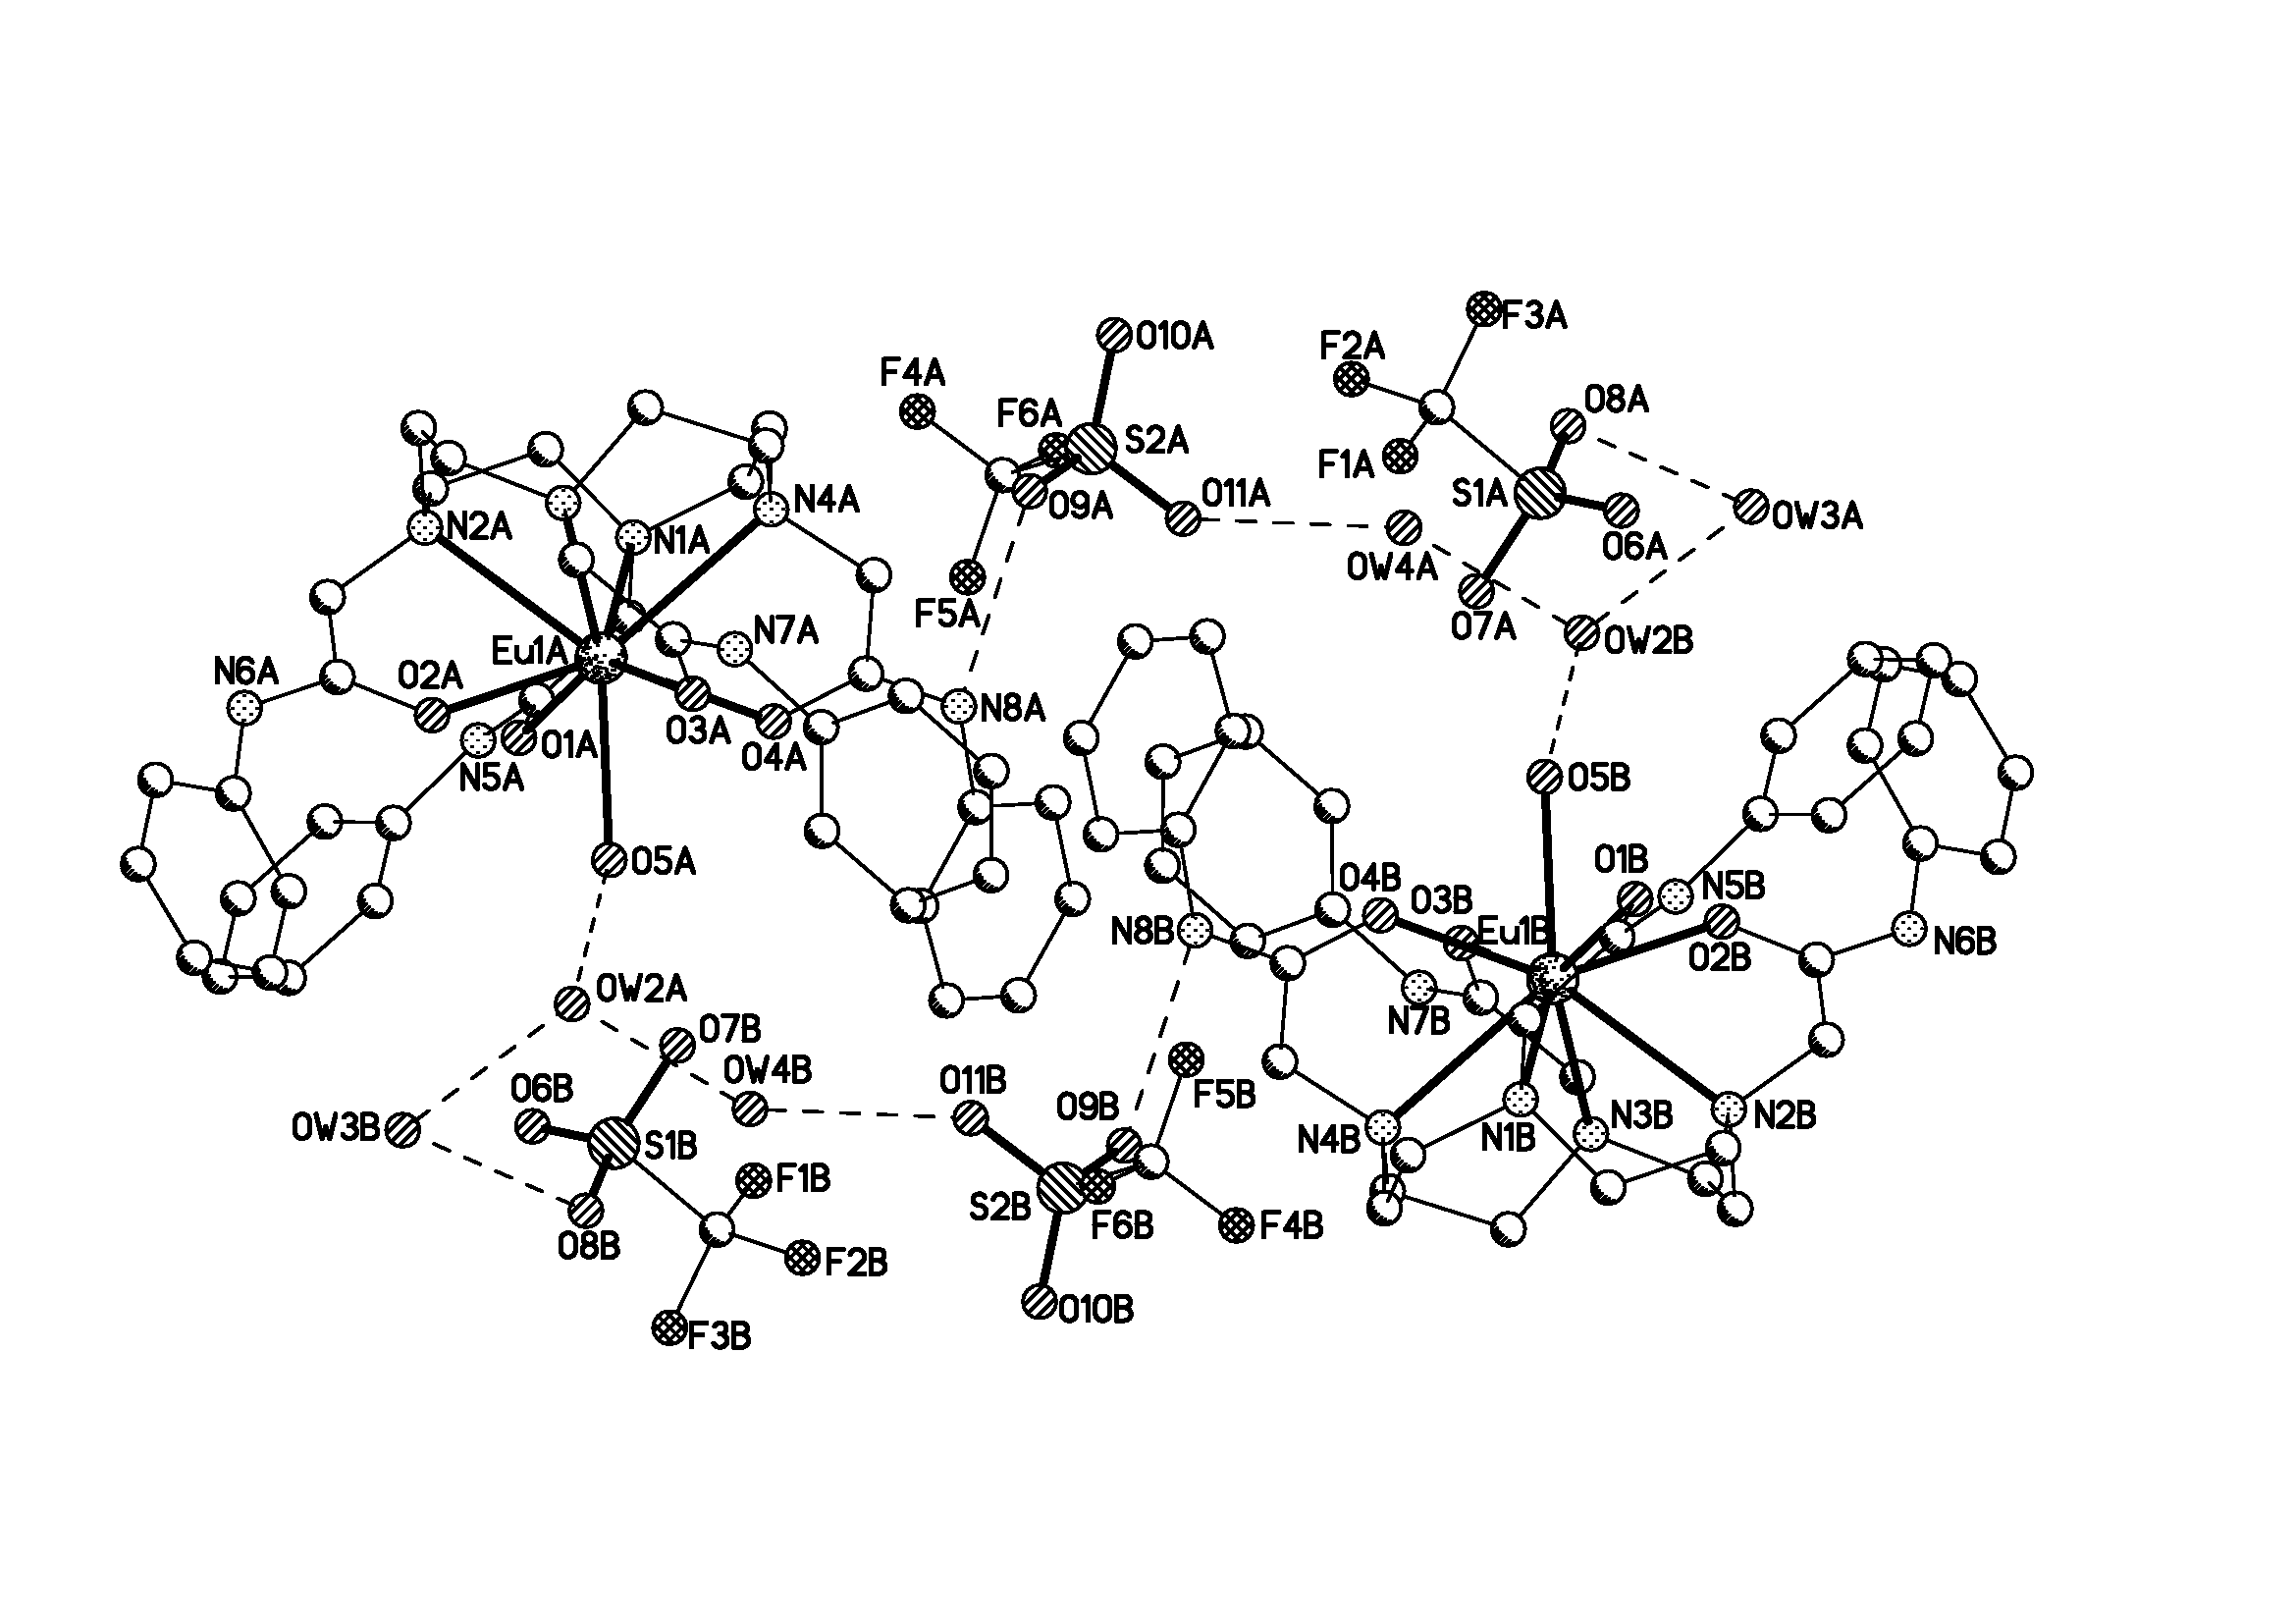


Figure S1. Network of hydrogen bonds occurring in [Eu(L2)(H2O)]3+.

**Figure S2.** Details of the 5D07FJ transitions (J = 1, 2, 4) in EuL1 (top, *Eexc* = 17 234cm-1,bandpath = 2 cm-1), EuL2 (middle, *Eexc* = 17 234cm-1,bandpath = 6 cm-1) and EuL3 (bottom, *Eexc* = 17 225cm-1,bandpath= 2 cm-1) in the solid state at 10 K. Asterisks refer to identified vibronic transitions.

10-3.*E* /cm-1

**Figure S3.** Emission spectra of L2 (a), L3 (b, c, d) L4 (f, g) and excitation spectra of L3 (e) in frozen solutions 77 K, (CH3CN, 1.10-4M). The following excitation (or analysis) energies, time delays and bandpaths were used : a) 42 194 cm-1, 30 s, 5 nm; b) 41 667 cm-1, 0 s, 5 nm; c) 41 667 cm-1, 50 s, 5 nm; d) 41 667 cm-1, 30 s, 15 nm; e) 20 830 cm-1; f) 42194 cm-1, 0 s, 5 nm; g) 42 194cm-1, 100 s, 10 nm.

# Figure S4. Temperature dependence of **(5D4 in TbL3 between 150 and 250 K in the solid state.

**Figure S5.** 1H-NMR spectra of LuL3 at 293 K (top) and 233 K (bottom) in CD3CN.
